# Supplementary figures and images for: Thermo-responsive engineering of Greencrete blocks: a foundational study toward waste-based next-generation concrete
Source: Research Square preprint supplement (doi:10.21203/rs.3.rs-7381327/v1), 2025-09-16

**Graphical abstract**


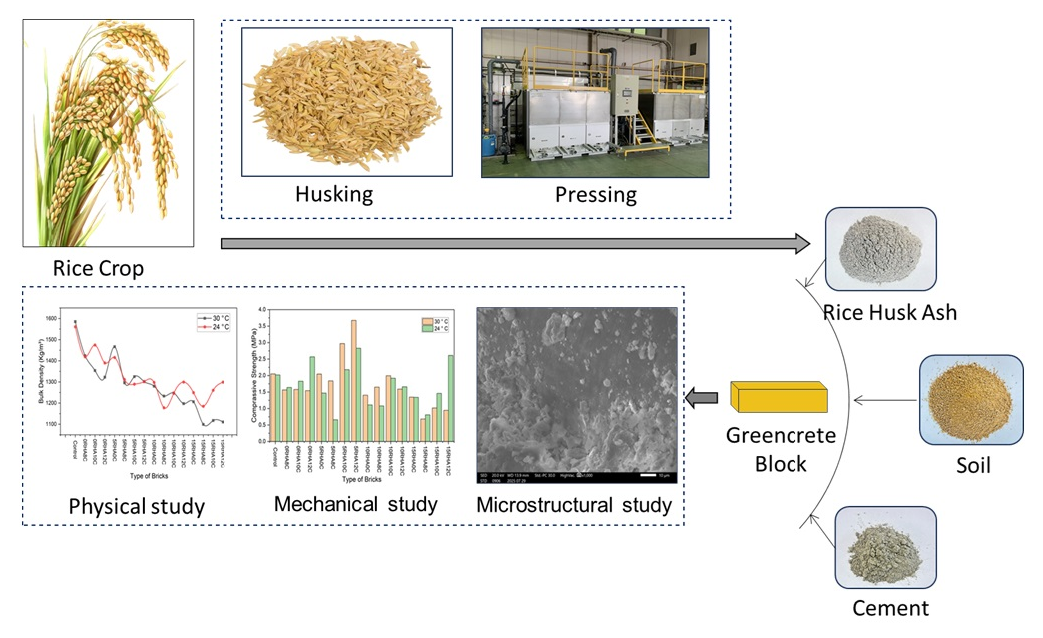

Supplement: Supplementary file 1 [file 0c588e937fe9e6870b9885b5.docx]
